# Protection from harvesting promotes energetically efficient structures in marine communities

Andrea Tabi<sup>1,2,3\*</sup>, Luis J. Gilarranz<sup>4</sup>, Spencer A. Wood<sup>5</sup>, Jennifer A. Dunne<sup>6</sup>, Serguei Saavedra<sup>7</sup>

<sup>1</sup>Institute for Cross-Disciplinary Physics and Complex Systems (IFISC),  
Consejo Superior de Investigaciones Científicas (CSIC) and University of Balearic Islands,  
07122 Palma de Mallorca, Spain

<sup>2</sup>School of Biological Sciences, University of Canterbury,  
Private Bag 4800, Christchurch 8140, New Zealand

<sup>3</sup> Te Pūnaha Matatini, Centre of Research Excellence in Complex Systems, New Zealand

<sup>4</sup>Department of Aquatic Ecology, Eawag (Swiss Federal Institute of Aquatic Science and Technology),  
Überlandstrasse 133, 8600, Dübendorf, ZH, Switzerland

<sup>5</sup>College of the Environment, University of Washington,  
Seattle, WA 98195, USA

<sup>6</sup>Santa Fe Institute,  
Santa Fe, NM 87501, USA

<sup>7</sup>Department of Civil and Environmental Engineering, MIT,  
77 Massachusetts Av., Cambridge, MA 02139, USA

\* To whom correspondence should be addressed. E-mail: [andrea.tabi@gmail.com](mailto:andrea.tabi@gmail.com)

CLASSIFICATION: Biological Sciences - Ecology

KEYWORDS: scaling theory | causal inference | community structure | energy efficiency | perturbations | protected areas

COMPETING FINANCIAL INTERESTS The authors declare no competing financial interests.

**Acknowledgments** A.T. was supported by the Spanish State Research Agency, through the Maria de Maeztu Program for Units of Excellence in R&D (MDM-2017-0711) and Te Pūnaha Matatini, a Centre of Research Excellence funded by the Tertiary Education Commission, New Zealand. L.J.G. was supported by the Swiss National Science Foundation Ambizione Fellowship, PZ00P3\_185951. S.W. and J.D. were supported by the Santa Fe Institute. S.S. was supported by NSF DEB-2024349 and MIT Sea Grant College Program.

## 1 **Abstract**

2 The sustainability of marine communities is critical for supporting many biophysical processes that  
3 provide ecosystem services that promote human well-being. It is expected that anthropogenic dis-  
4 turbances such as climate change and human activities will tend to create less energetically-efficient  
5 ecosystems that support less biomass per unit energy flow. It is debated, however, whether this ex-  
6 pected development should translate into bottom-heavy communities (with small basal species being  
7 the most abundant and large apex predators the least abundant) or top-heavy communities (where  
8 more biomass is supported at higher trophic levels with species having larger body sizes). Here, we  
9 combine ecological theory and empirical data to demonstrate that protection from harvesting promotes  
10 top-heavy energetically-efficient structures in marine communities. First, we use metabolic scaling the-  
11 ory to show that protected communities are expected to display stronger top-heavy structures than  
12 harvested communities. Similarly, we show theoretically that communities with high energy transfer  
13 efficiency display stronger top-heavy structures than communities with low transfer efficiency. Next,  
14 we use, as a natural experiment, the structures observed within fully protected marine areas compared  
15 to harvested areas across 299 geographical sites worldwide that vary in stress from thermal events and  
16 adjacent human activity. Using a nonparametric causal-inference analysis, we find a strong, positive,  
17 causal effect between protection from harvesting and top-heavy structures. Our work corroborates  
18 ecological theory on community development and provides a framework for additional research into  
19 the restorative effects of protected areas.

## 20 Introduction

21 Human activities and environmental change are accelerating rates of biodiversity loss from ecosystems  
22 worldwide (1–3). Through impacts on the distributions, abundances, and body sizes of organisms,  
23 anthropogenic stressors such as climate change and harvesting fundamentally alter community com-  
24 position (2, 4, 5). Loss of coral, for example, which occurs because of thermal stress as well as land-  
25 and ocean-based human activities (6), can lead to cascading effects on entire reef-associated commu-  
26 nities (7). Yet functional coral reefs and marine ecosystems generally are critical for maintaining the  
27 biophysical processes that support fisheries and other ecosystem services that contribute to human  
28 well-being (8–10).

29 It is hypothesized that less-disturbed communities will tend to develop more energetically-efficient  
30 systems (i.e., support more biomass per unit energy flow) (11, 12) based on the Energetic Equivalence  
31 Hypothesis (13) (the total energy flow through a population tends to be constant) and Metabolic  
32 Scaling Theory (14) (building on predator-prey mass ratios and transfer efficiencies (15)). In turn,  
33 distributions of species biomass within ecosystems should vary as a function of body size—commonly  
34 referred as differences in *community structure* (16–18). Body size is considered a “master trait” that  
35 scales with organisms’ physiology, regulating metabolic requirements (19), constraining feeding range  
36 (20), and shaping the trophic position of species in marine food webs due to energy transfers (21).  
37 It is debated, however, whether less disturbed systems should translate into bottom-heavy structures  
38 (small basal species are the most abundant and large apex predators the least abundant) or top-heavy  
39 structures (more biomass can be supported at higher trophic levels with species having larger body  
40 size) (17, 22–25). Debates continue about these hypotheses because of the lack of feasible interventions  
41 that can be done to test theoretical predictions in marine communities. For example, deviations of  
42 community structures in marine communities from theoretical expectations have been explained by  
43 processes including (23, 24) complex predatory behavior (e.g., large predators feed on lower trophic  
44 levels or have wider diet width (17)), foraging of mobile consumers for energy subsidies provided by fish  
45 spawning grounds (22, 26, 27), increased rates of trophic energy flux due to warming (14), decreased  
46 body size due to higher temperatures (28), and noise in local sampling (29). Yet, understanding the  
47 link between disturbance, efficiency, and structure is essential for determining the factors regulating  
48 the dynamics and sustainability of marine communities.

49 To address the debate between bottom- and top-heavy ecosystems, we need well-defined experiments  
50 that eliminate all sources of bias using randomized controlled trials and test the effectiveness of a  
51 given intervention (30). Indeed, while observational data are designed to predict likely mechanisms  
52 or processes, they cannot establish cause-effect relationships, only associations (30, 31). That is,  
53 following Reichenbach’s principle (32), if two variables are statistically related, then there exists a

54 third variable or context that causally influences both (known as a confounding effect). In this line,  
55 causal inference tools, such as path analysis or structural equation modeling (31), have been developed  
56 to obtain information about causes from observations. While extremely useful, these tools assume  
57 linearity or monotonicity in all the relationships, but many times this can be difficult to prove (30, 33).  
58 Nevertheless, new advancements in nonparametric, causal, inference analysis do not require linearity  
59 assumptions and allow us to investigate the nature and extent to which a likely cause can affect the  
60 probability that a given effect happens (30). In particular, efforts focus on inferring *genuine* causal  
61 effects, where the cause-effect relationship between two variables holds under every context denoting  
62 the highest level of causal inference (30, 34).

63 As it is unfeasible to perform large-scale and controlled experiments of disturbance in marine commu-  
64 nities, marine protected areas (MPAs) present a unique natural experiment and observational data  
65 to infer the causal relationship between protection from harvesting (less disturbance) and community  
66 structure in conjunction with differing levels of thermal stress and human activity. First, we use  
67 metabolic scaling theory (14) to establish theoretical predictions about the cause-effect relationship  
68 between harvesting (or protection from harvesting) and structure of marine communities. Next, we use  
69 the community structures observed within fully protected marine areas compared to harvested areas  
70 across 299 geographical sites worldwide, comprising population data from 1,479 non-benthic marine  
71 species. Because no two communities are subject to the same internal (17, 27) (e.g., interspecific  
72 effects) and external conditions (35) (e.g., thermal stress), we follow a nonparametric causal-inference  
73 analysis (30, 34) to test the existence of a *genuine* causal relationship between protection from harvest-  
74 ing and top-heavy structures under the context of anthropogenic effects and climate change. Finally,  
75 we discuss the implications of our results for the protection of marine communities and future avenues  
76 of research.

## 77 Results

### 78 Theoretical Analysis

79 To establish our theoretical predictions, we start by studying how changes in transfer efficiency (TE)  
80 across trophic levels affect the structure of marine communities. Specifically, we conduct a synthetic  
81 analysis based on metabolic scaling (14). Following Ref. (16), we assume that size-based predation  
82 is responsible for the pathways of energy transfer in food webs from basal to higher trophic levels  
83 (see Methods for details). First, we randomly generate food web matrices based on the general niche  
84 model (36). Second, using scaling relationships (37), for each community, we calculate average body  
85 sizes for each species  $i$  as  $M_i = PPMR_i^{(TP_i-1+\epsilon)}$ , where  $TP_i$  corresponds to trophic position,  $PPMR_i$   
86 is the predator-prey body-mass ratio, and a small random noise  $\epsilon$ . The PPMR increases with trophic

87 position based on empirical observations (22, 38), so that the maximum predator-prey mass ratio for  
88 large consumers ranges around  $10^3 - 10^4$  in each community (Fig. 1A). Third, following Refs. (17, 38),  
89 we determine the transfer efficiency of each species  $i$  based on its body size as  $TE_i = s_{TE} \cdot M_i^{-0.07}$  and  
90 community transfer efficiency ( $TE_c$ ) as the average of  $TE_i$ . Lastly, following Ref. (14), we assume  
91 that biomass is a function of average body size in the form  $B_i = M_i^{k_i}$ , where  $k_i$  the size-spectra scaling  
92 factor (community structure) defined as  $k_i = 0.25 + \log(TE_i)/\log(PPMR_i)$ . The community scaling  
93 coefficient ( $k_c$ ) is calculated as the slope of the linear regression between log biomasses ( $B_i$ ) and body  
94 sizes ( $M_i$ ).

95 To theoretically investigate the potential effect of protection from harvesting on community structure,  
96 we simulate a size-selective harvest of large fish species (25) (see Methods for details). This selection  
97 effectively distorts body size distributions by decreasing the average body size of the harvested species  
98 (Fig. 1B). After calculating the harvested biomasses, the harvested community scaling coefficient  $k_c^h$  is  
99 given as the slope of least square regression between log harvested biomasses ( $B_i^h$ ) and log harvested  
100 mean body sizes ( $M_i^h$ ). Figure 1C shows that the mean and variance of  $k_c$  (protected communities) are  
101 higher than  $k_c^h$  (harvested communities). Notably, these differences become more pronounced when the  
102 communities are characterized by higher community transfer efficiencies  $TE_c$  (see also supplementary  
103 Fig. S3). These theoretical results reveal that protected communities are expected to develop more  
104 energetically-efficient top-heavy structures, as developmental hypotheses suggest (11, 12).

## 105 Empirical Analysis

106 To conduct our nonparametric causal inference analysis, we use observational data from marine reef-  
107 fish communities. These data comprise more than 1,500 fish species observations together with spa-  
108 tial, temporal, and climatic variables across 299 sampling sites worldwide from the Reef Life Survey  
109 database (39) (Fig. 2, Methods). For each sampling location, we compile data on whether the reef is  
110 within 10 km of a fully protected area (IUCN Category Ia: Strict Nature Reserve) as well as external  
111 conditions, including: whether it is associated with a coral reef within a 10-km radius, human pop-  
112 ulation density (people per km<sup>2</sup>) within 25 km radius, as a proxy for human activity (40), and how  
113 frequently it experienced thermal stress anomalies (TSA) (41), as a measure of one climate-driven  
114 impact.

115 Community structure is traditionally measured by the power law exponent ( $k$ ) between body sizes and  
116 abundances (or biomasses) of species or trophic groups (17). We calculate the empirical community  
117 scaling exponent  $k_c^e$  as the slope of the least squares regression between log average body sizes and log  
118 biomasses of species for each community. The higher the values of  $k_c^e$ , the stronger a community is  
119 characterized by a top-heavy structure. Because the theoretical power-law exponent is constrained to  
120 be  $k < 0$  unless predators are on average smaller than their prey (17, 22), we reduce the empirically

121 estimated  $k_c^e$  by 1 to make theoretical and empirical results comparable.

122 We follow Ref. (30) to investigate the existence of a *genuine* causal relationship between protection  
123 from harvesting (measured as MPAs) on the structure of fish communities (measured by  $k$ ). The  
124 necessary condition for the existence of a *genuine* causal relationship is the fulfilment of a statistical  
125 three-step criterion (see Methods for details). Once fulfilled, the genuine causal effect of  $X$  on  $Y$   
126 can then be quantified as the average causal effect ( $ACE_{XY}: \frac{\partial}{\partial x} E[Y|do(X=x)]$ ) following the rules of  
127 *do*-calculus (30, 42) (see Methods for details). These rules allow us to translate (whenever possible)  
128 interventional conditional distributions  $P(Y = y|do(X = x))$  into observational conditional distribu-  
129 tions  $P(Y = y|X = x)$ . To both standardize and simplify our analysis, we transform all quantitative  
130 variables into binary variables based on the median values. That is, values above the median are trans-  
131 lated as  $V = 1$ , otherwise  $V = 0$ . Note that other variables are already binary by construction, such  
132 as the presence of protected areas and coral reefs. Formally, this binarization simplifies the analysis  
133 into  $ACE_{XY} = P(Y = 1|do(X = 1)) - P(Y = 1|do(X = 0))$ .

134 Table 1 shows all six possible combinations under which it is possible to satisfy the three-step criterion  
135 necessary for inferring a *genuine* effect between protection from harvesting and community structure.  
136 Note that the greater the number of combinations, the stronger the support for a *genuine* effect  
137 (30, 42). Thus, following the relationships in Table 1 and the rules of *do*-calculus (30), the ACE  
138 between protection from harvesting (MPAs) and structure ( $k_c^e$ ) can be computed simply using the  
139 observational probabilities  $ACE = P(k = 1|Protection = 1) - P(k = 1|Protection = 0)$ . Recall that  
140 we transform all variables into binary values (1: above median, 0: below median) and higher values  
141 of  $k_c^e$  represent stronger top-heavy structures. Specifically, we find that fully protected areas directly  
142 increase by 43% ( $ACE = 0.431$ ) the probability of observing fish communities with higher-than-  
143 average top-heavy structures. Indeed, Fig. 3 confirms that protected areas display stronger top-heavy  
144 structures than harvested areas across any combination of the external variables (Table 1) required to  
145 fulfil the three-step criterion for a *genuine* causal relationship.

## 146 Discussion

147 Our findings suggest that full marine protection (MPAs under IUCN Category Ia) regulates the struc-  
148 ture of marine communities. Specifically, we have shown that protection against fishing in no-take  
149 MPAs directly increases by 43% the probability that fish communities display a stronger top-heavy  
150 structure, relative to limits imposed by the environmental context, and thus supporting more biomass  
151 per unit of energy flow. Moreover, we show that top-heavy community structures in marine ecosys-  
152 tems are theoretically possible following the assumptions established by the Energetic Equivalence  
153 Hypothesis and Metabolic Scaling Theory (13, 14). That is, the higher the transfer efficiency in

154 marine communities, the stronger the magnitude and variation of top-heavy structures. By theoret-  
155 ically mimicking size-selective harvesting, we have also shown that harvested communities tend to  
156 develop more bottom-heavy structures compared to the unharvested state—consistent with empirical  
157 observations (25). Using fully protected areas as a natural experiment, we have corroborated the exist-  
158 ence of a positive *genuine* cause-effect relationship between protection from harvesting and top-heavy  
159 structures. The close match between our theoretical predictions and empirical findings supports the  
160 hypothesis that less disturbed ecosystems tend to be more energetically efficient (11, 12).

161 Our theoretical model based on metabolic scaling relationships provides qualitative predictions re-  
162 garding the shape of community structure, in terms of biomass distribution across body sizes and  
163 its association with energy transfer efficiency. The shape of community structure carries informa-  
164 tion about ecological processes that potentially allow us to predict future community responses to  
165 disturbance and other types of environmental changes. While we were not able to calculate the en-  
166 ergy efficiency in empirical communities directly, the similarity of our theoretical results to observed  
167 structural patterns strongly suggests that protected communities exhibit more energetically efficient  
168 structures compared to harvested communities. Yet, the link between community structure and en-  
169 ergy transfer efficiency in empirical settings should be further investigated. Indeed, multiple processes  
170 can impact the efficiency of energy transfer in marine communities, such as different temperature sen-  
171 sitivity of metabolism across trophic levels, resource availability, and quality or non-predatory fluxes  
172 of organic material (43). In fact, it is estimated that transfer efficiency varies widely between 1—52%  
173 across different regional and environmental contexts (43). Our results point towards a large impact of  
174 transfer efficiency on community structure and composition, highlighting an important dynamic that  
175 has been understudied (44).

176 In our theoretical analysis, we perturbed the biomasses and body size distributions, assuming size-  
177 selective harvesting as the only source of disturbance. This selection consequently reduces predator-  
178 prey body size ratios and the transfer efficiencies of the harvested species. Predator-prey mass ratio  
179 plays an important role in food web stability (45) and, together with transfer efficiency, determines  
180 the shape of community structure. However, other mechanisms such as spatial energy subsidies (22)  
181 or changes in predator-prey structure can also be responsible for reshaping community structure.  
182 For example, it has been shown that the presence of both large generalist predators and gigantic  
183 secondary consumers that feed much lower in the trophic web than predicted by size alone can lead to  
184 top-heavy structures (17). Therefore, more detailed information about predator-prey interactions is  
185 needed to separate the different cause-effect relationships among species richness, species interactions,  
186 and community structure (46).

187 As human density and cumulative impacts in coastal areas increases (47, 48), and thermal stress  
188 anomalies become more frequent due to climate change (4, 49), it becomes increasingly important

189 to sustain the function of marine communities (50). While we have not studied the recovery of  
190 communities to a specific restoration baseline (which remains highly debated (51)), our results do point  
191 towards a strong, positive, *genuine* effect of protection from harvesting and the structure and efficiency  
192 of fish communities. Therefore, we believe that our theoretical and nonparametric methodologies can  
193 be used as a quantitative framework to study and guide experimental work focused on measuring the  
194 effect of potential interventions on relevant reference states of ecological communities in general.

## 195 **Methods**

196 **Data.** We analyzed 479 sampled communities from 299 sites (Fig. 2) from the Reef Life Survey  
197 database (39) comprising population data from more than 1,500 non-benthic marine species with  
198 individual body size information. Body size was measured as biomass and data were aggregated by  
199 year. We included only sampling sites in our analysis, which were surveyed more than once per year  
200 (52). This decision was based on the rarefaction analysis and Kolmogorov–Smirnov tests to assess the  
201 impacts of annual sampling effort on species richness (see supplementary Section S1 for more details).  
202 We collected weekly sea surface temperature (SST) from NOAA’s (National Oceanic and Atmospheric  
203 Administration) remote sensing database. We used the sum of TSA in our analysis, calculated as  
204 the weekly sea surface temperature (SST) minus the maximum weekly climatological SST. TSA was  
205 measured as the number of events when the average difference between weekly SST and the maximum  
206 weekly climatological was above 1°C between 1982 and 2019 (41). The distribution of warm-water  
207 coral reef was obtained from UNEP-WCMC World Fish Centre database (53). The information on  
208 marine protected areas was obtained from UNEP-WCMC and IUCN Protected Planet database (54).  
209 The information on human population density was obtained from Gridded Population of the World  
210 (55). The human population density was quantified as *humans*/ $Km^2$  in a 25-km radius around the  
211 sampling site (47). Lastly, we used the regression coefficient ( $k$ ) between log biomass and log of  
212 average body sizes as a measure of community structure. The higher the values of  $k$ , the stronger a  
213 community is characterized by a top-heavy structure. Because the theoretical power-law exponent ( $k$ )  
214 is constrained to be  $k < 0$  unless predators are on average smaller than their prey (17), we reduced  
215 the empirically estimated  $k$  by 1 to make theoretical and empirical results comparable. We found  
216 qualitatively similar results if we use the Spearman’s rank correlation coefficient ( $\rho$ ) between biomass  
217 and average body sizes as a measure of community structure. Values closer to  $\rho = 1$  (resp.  $\rho = -1$ )  
218 specify communities closer to a perfect top-heavy (resp. bottom-heavy) structure.

219 **Theoretical analysis.** To carry out our theoretical analysis, we randomly generated food web matri-  
220 ces of 50 species based on the general niche model (36). Following Ref. (56), we set the connectance of  
221 each food web given by the function of the number of species as  $C = S^{-0.65}$  (different parameter val-  
222 ues yield qualitatively similar results). Second, using scaling relationships (37), for each community,



223 we calculated average body sizes for each species  $i$  as  $M_i = PPMR_i^{(TP_i-1+\epsilon)}$ , where  $TP_i$  corre-  
224 sponds to trophic position,  $PPMR_i$  is the predator-prey body-mass ratio, and a small random noise  
225  $\epsilon \sim N(0, 0.1)$ . The PPMR increases with trophic position based on empirical observations (22, 38),  
226 so that the maximum predator-prey mass ratio for large consumers ranges around  $10^3 - 10^4$  in each  
227 community (Fig. 1A) and the size of the smallest fish between 0 and 1 corresponding to empirical  
228 data. Third, following Refs. (17, 38), we determined the transfer efficiency of each species  $i$  based  
229 on its body size as  $TE_i = s_{TE} \cdot M_i^{-0.07}$  and community transfer efficiency ( $TE_c$ ) as the average of  
230  $TE_i$ . Fourth, to systematically investigate the effect of energy-transfer efficiency, we varied the scaling  
231 factor of transfer efficiency  $s_{TE} \in (0, 1)$ —higher values lead to higher efficiency. Fifth, following Ref.  
232 (14), we assumed that biomass is a function of average body size in the form  $B_i = M_i^{k_i}$ , where the  
233 size-spectra scaling factor is defined as  $k_i = 0.25 + \log(TE_i)/\log(PPMR_i)$ . The community scal-  
234 ing coefficient ( $k_c$ ) was estimated as the slope of the least square regression between log harvested  
235 biomasses ( $B_i$ ) and log harvested body sizes ( $M_i$ ). To theoretically investigate the potential effect of  
236 protection from harvesting on community structure, we assumed a size-selective harvest of large fish  
237 species (25). Following Ref. (57), size-selective harvest affects species in two ways; it decreases the  
238 average body size and reduces the number of individuals. Thus, in each simulation, we set the fraction  
239 of the community harvested to 50% (different percentages yield qualitatively similar results) and we  
240 determined the identity of harvested species from the community by randomly sampling where we  
241 assigned higher probability to larger fish species to be selected. As a next step, we randomly sampled  
242 the level of harvest for each fished species ( $r_i$ ) from a uniform distribution ( $U[0.3, 1]$ ), where we set the  
243 minimum amount of removal at 30%. Then, we resampled the body size distributions ( $N(M, 0.1M)$ )  
244 of harvested species by assigning higher probabilities to larger individuals to be selected. Finally, we  
245 calculated the new mean body sizes and harvested biomass ( $B_i^h$ ) for each fished species. The harvested  
246 community scaling coefficient ( $k_c^h$ ) was estimated as the slope of the least square regression between  
247 log harvested biomasses ( $B_i^h$ ) and log harvested body sizes ( $M_i^h$ ).

248 **Genuine causal relationship.** Following Ref. (30), the subsequent statistical three-step criterion  
249 needs to be fulfilled in order to establish a *genuine* causal effect of random variable  $X$  on random  
250 variable  $Y$ . (i)  $X$  has to be statistically dependent on  $Y =$  under a context  $C$  (set of additional  
251 variables). (ii) There must be a potential cause  $Z$  of  $X$ . This is true if  $Z$  and  $X$  are statistically  
252 dependent under context  $C$ , there is a variable  $W$  and context  $S_1 \subseteq C$  such that  $Z$  and  $W$  are  
253 statistically independent, and  $W$  and  $X$  are statistically dependent. (iii) There must be a context  
254  $S_2 \subseteq C$  such that variables  $Z$  and  $Y$  are statistically dependent but statistically independent under  
255 the context  $S_2 \cup X$ . This 3-step criterion assumes that measured variables are affected by mutually  
256 independent, unknown, random variables.

257 **Rules of *do*-calculus.** For readers' convenience, here we write the three rules of *do*-calculus (30). Let

258  $G$  be a DAG associated with a causal model and let  $P$  stand for the probability distribution induced  
259 by that model. Let  $G_{\overline{X}}$  denote the graph obtained by deleting from  $G$  all arrows pointing to nodes  
260 in  $X$ . Likewise,  $G_{\underline{X}}$  denotes the graph obtained by deleting from  $G$  all arrows emerging from nodes  
261 in  $X$ . Finally, let  $Z(W)$  denote the set of  $Z$ -nodes that are not ancestors of any  $W$ -node. For any  
262 disjoint subset of variables  $X, Y, Z$  and  $W$ , we have the following three rules. Rule 1 (insertion/deletion  
263 of observations):  $P(y|do(x), z, w) = P(y|do(x), w)$  if  $(Y \perp\!\!\!\perp Z|X, W)_{G_{\overline{X}}}$ . Rule 2 (action/observation  
264 exchange):  $P(y|do(x), do(z), w) = P(y|do(x), z, w)$  if  $(Y \perp\!\!\!\perp Z|X, W)_{G_{\overline{X}Z}}$ . Rule 3 (insertion/deletion  
265 of actions):  $P(y|do(x), do(z), w) = P(y|do(x), w)$  if  $(Y \perp\!\!\!\perp Z|X, W)_{G_{\overline{X}, Z(W)}}$ . Note that  $\perp\!\!\!\perp$ : independent  
266 and  $\not\perp\!\!\!\perp$ : dependent.

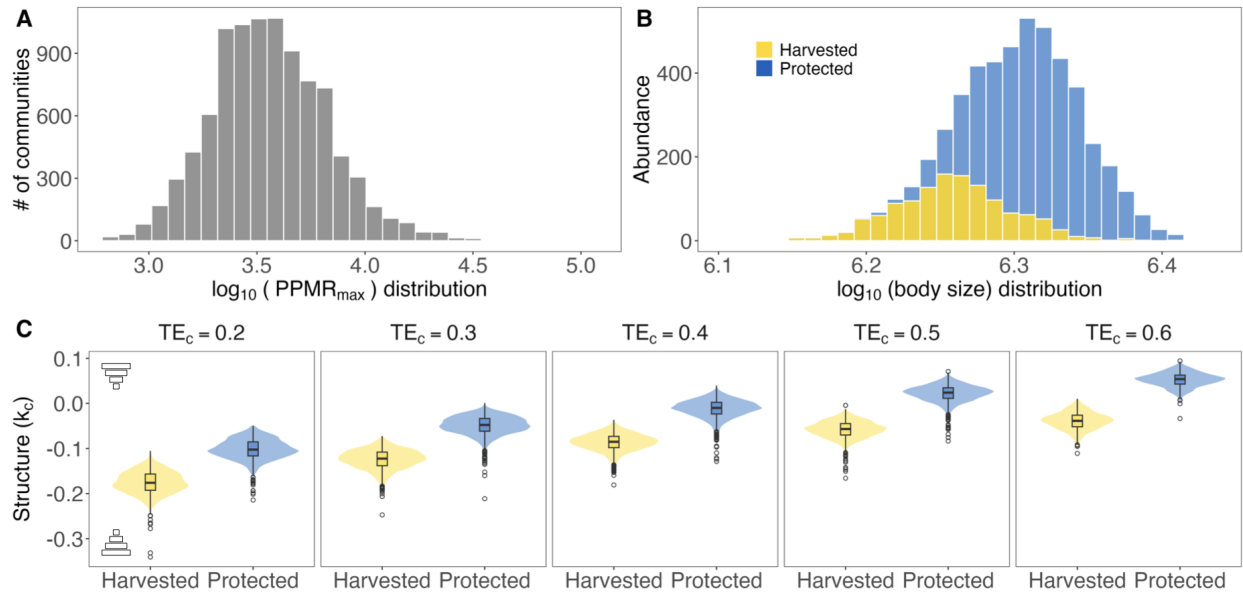

Figure 1: **Theoretical predictions.** Using Metabolic Scaling Theory (see Methods for details), Panel (A) depicts the distribution of the maximum values of predator-prey mass ratios (PPMR) in each simulated community. Panel (B) shows how simulated selective harvesting affects the body size distribution of species. Specifically, selective harvesting is expected to reduce the number of individuals as well as decrease the average body size. Panel (C) shows that protected marine communities (blue boxplots) are expected to display stronger top-heavy structures than harvested communities (yellow boxplots). Community structure is measured by the community size spectra scaling exponent ( $k_c$ ), and higher values represent stronger top-heavy structures. Similarly, communities with high transfer efficiency ( $TE_c$ ) display stronger top-heavy structures than communities with low efficiency.

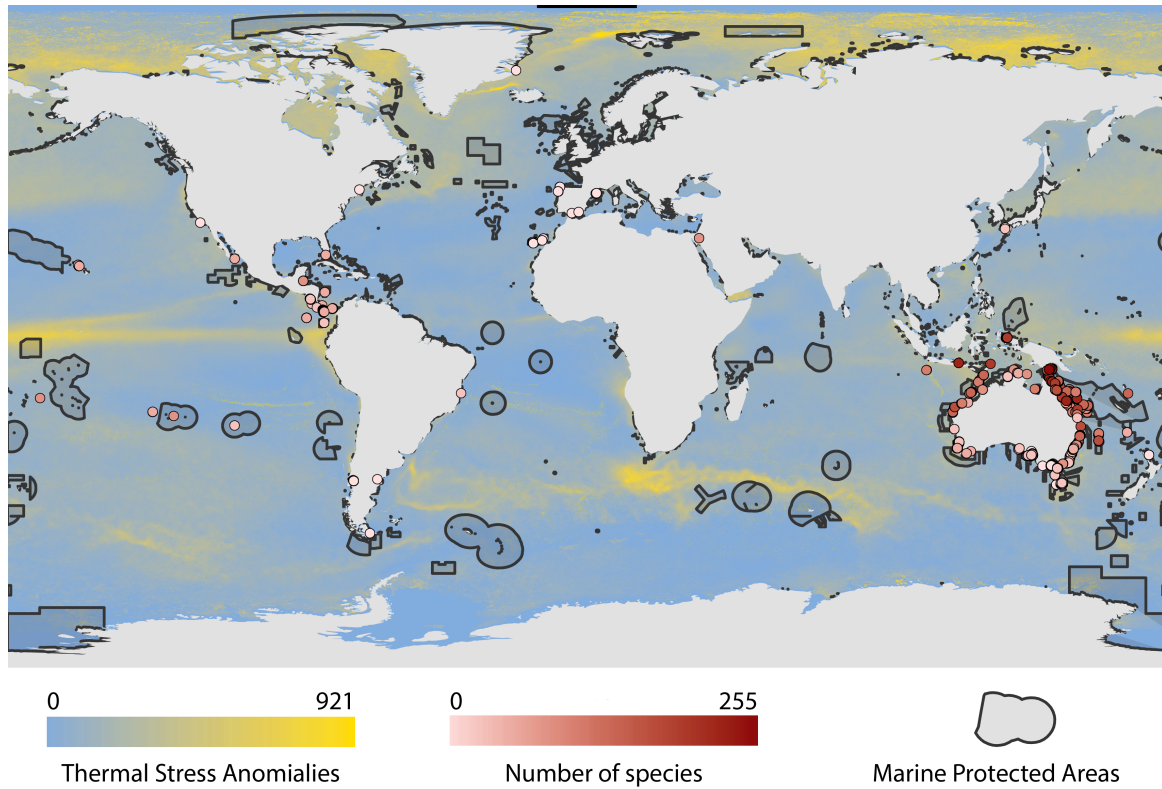

Figure 2: **Global distribution of sampling sites and their attributes under our studied dataset.** We consider only sampling sites (299 sites in total) in our analysis, which were surveyed more than once per year. Data compiled from the Reef Life Survey database (39) (see Methods for details). The color of the circles corresponds to the number of species observed at a given site. The background color corresponds to the thermal stress anomalies (TSA), which are calculated as the sum of all the values of TSA between 1982 and 2019, at which the average value of TSA was above 1 °C. The black lines show the borders of reported Marine Protected Areas (MPAs under IUCN Category Ia).

|       | Variables                            | Conditions                                               | $G^2$ test (p-value) |
|-------|--------------------------------------|----------------------------------------------------------|----------------------|
| i     | X=Protection $\not\perp$ Y=Structure | $C = \{\text{Human, Coral, TSA}\}$                       | $< 10^{-4}$          |
| ii    | Z=Human $\not\perp$ X=Protection     | $C = \{\text{Coral, TSA, Structure}\}$                   | $< 10^{-4}$          |
| ii.1  | Z=Human $\perp$ W=TSA                | $S_1 = \{\}$                                             | 0.579                |
|       | X=Protection $\not\perp$ W=TSA       | $S_1 = \{\}$                                             | $< 10^{-6}$          |
| ii.2  | Z=Human $\perp$ W=Coral              | $S_1 = \{\}$                                             | 0.174                |
|       | X=Protection $\not\perp$ W=Coral     | $S_1 = \{\}$                                             | $< 10^{-5}$          |
| iii   | Z=Human $\not\perp$ Y=Structure      | $S_2 = \{\text{Coral, TSA}\}$                            | $< 10^{-3}$          |
|       | Z=Human $\perp$ Y=Structure          | $S_2 = \{\text{Coral, TSA}\} \cup X=\text{Protection}$   | 0.434                |
| iib   | Z=TSA $\not\perp$ X=Protection       | $C = \{\text{Coral, Human, Structure}\}$                 | $< 10^{-8}$          |
| iib.1 | Z=TSA $\perp$ W=Human                | $S_1 = \{\}$                                             | 0.579                |
|       | X=Protection $\not\perp$ W=Human     | $S_1 = \{\}$                                             | $< 10^{-4}$          |
| iib.2 | Z=TSA $\perp$ W=Coral                | $S_1 = \{\}$                                             | 0.774                |
|       | X=Protection $\not\perp$ W=Coral     | $S_1 = \{\}$                                             | $< 10^{-5}$          |
| iiib  | Z=TSA $\not\perp$ Y=Structure        | $S_2 = \{\text{Coral, Human}\}$                          | $< 10^{-3}$          |
|       | Z=TSA $\perp$ Y=Structure            | $S_2 = \{\text{Coral, Human}\} \cup X=\text{Protection}$ | 0.173                |
| iic   | Z=Coral $\not\perp$ X=Protection     | $C = \{\text{TSA, Human, Structure}\}$                   | $< 10^{-4}$          |
| iic.1 | Z=Coral $\perp$ W=Human              | $S_1 = \{\}$                                             | 0.174                |
|       | X=Protection $\not\perp$ W=Human     | $S_1 = \{\}$                                             | $< 10^{-4}$          |
| iic.2 | Z=Coral $\perp$ W=TSA                | $S_1 = \{\}$                                             | 0.774                |
|       | X=Protection $\not\perp$ W=Coral     | $S_1 = \{\}$                                             | $< 10^{-5}$          |
| iiic  | Z=Coral $\not\perp$ Y=Structure      | $S_2 = \{\text{TSA, Human}\}$                            | $< 10^{-4}$          |
|       | Z=Coral $\perp$ Y=Structure          | $S_2 = \{\text{TSA, Human}\} \cup X=\text{Protection}$   | 0.053                |

Table 1: ***Genuine* causal relationship between protection from harvesting and community structure.** Following Ref. (30), we test the statistical 3-step criterion (i-iii) required to infer a *genuine* cause-effect relationship, the highest-level of causal inference that can be achieved (see Methods for details). Note that steps ii and iii have six alternative routes (30, 42). That is, Route 1: i-ii-ii.1-iiia. Route 2: i-ii-ii.2-iiia. Route 3: i-iib-iib.1-iiib. Route 4: i-iib-iib.2-iiib. Route 5: i-iic-iic.1-iiic. Route 6: i-iic-iic.2-iiic. The larger the number of routes, the stronger the support. We use  $G^2$  test of independence (58). We reject independency when the p-value  $> 0.05$ .  $\perp$ : independent,  $\not\perp$ : dependent

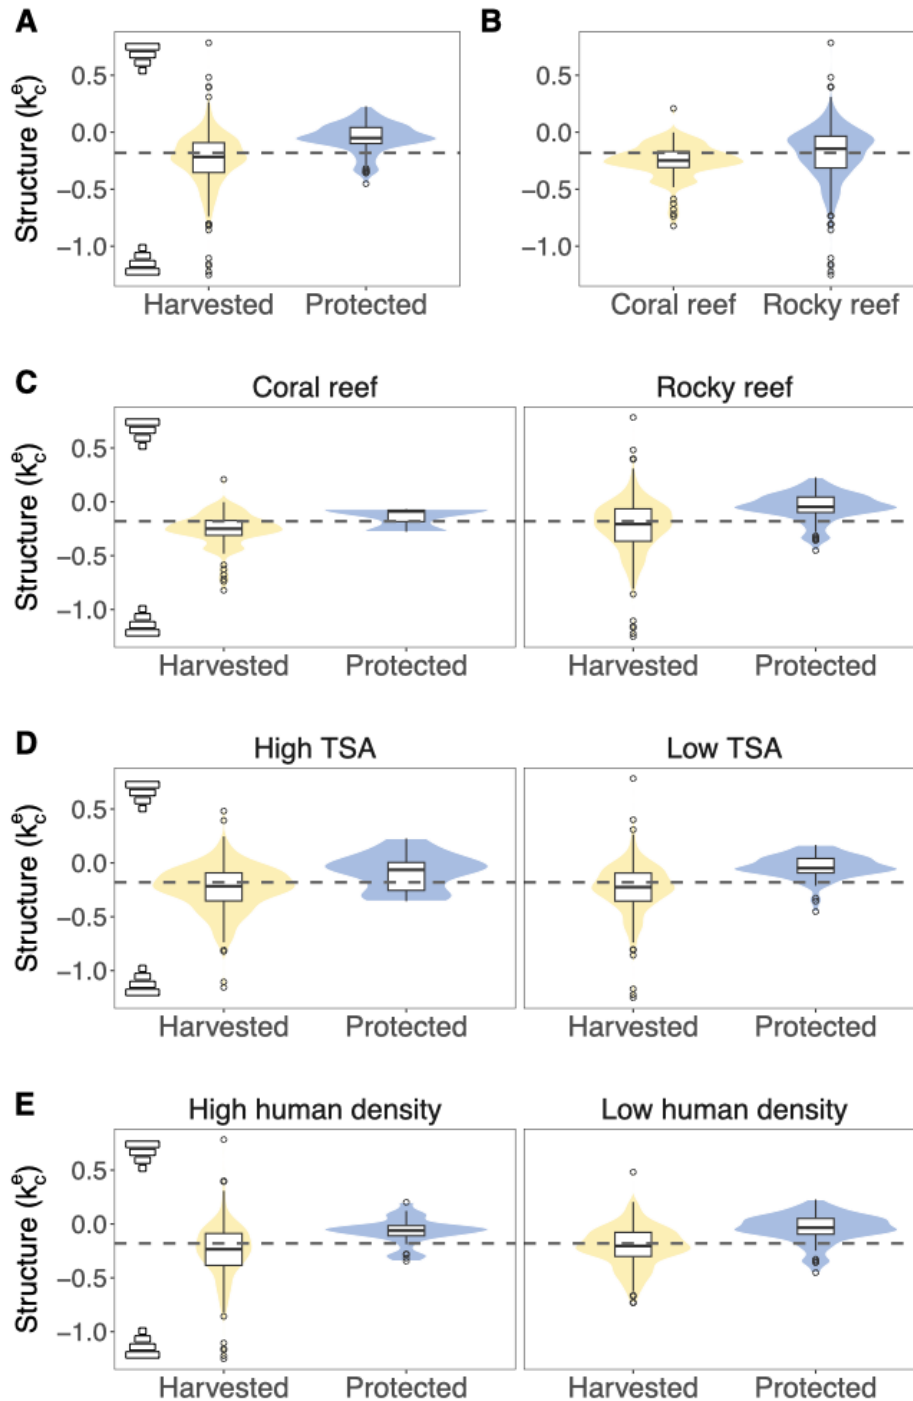

**Figure 3: Distribution of community structures across different marine and geographical properties.** The panels show the empirical distribution of community structures, measured as the regression coefficient ( $k_c^e$ ) between log average body size and log biomass. Higher values of  $k_c^e$  represent stronger top-heavy structures. Density: human density (people per  $\text{km}^2$ ) within 25 km radius following Ref. (40). High and Low categories are Distributions separated by protected communities (MPAs under IUCN Category Ia) and harvested communities (not MPAs). We transform all quantitative variables into binary variables based on the median values. That is, values above the median are translated as  $V = 1$ , otherwise  $V = 0$ . We refer to  $V = 1$  (resp.  $V = 0$ ) to *high* (resp. *low*) values. Note that some variables are already binary by definition, such as the presence or absence of MPAs and coral reefs.

## 267 **References**

- 268 [1] IPCC (2019) Special Report on the Ocean and Cryosphere in a Changing Climate [H.-O. Pörtner  
269 et al)], Technical report.
- 270 [2] Halpern BS, et al. (2008) A Global Map of Human Impact on Marine Ecosystems. *Science*  
271 319:948–952.
- 272 [3] Sala E, Knowlton N (2006) Global Marine Biodiversity Trends. *Annual Review of Environment*  
273 *and Resources* 31:93–122.
- 274 [4] Burrows MT, et al. (2011) The Pace of Shifting Climate in Marine and Terrestrial Ecosystems.  
275 *Science* 334:652–655.
- 276 [5] Poloczanska ES, et al. (2013) Global imprint of climate change on marine life. *Nature Climate*  
277 *Change* 3:919–925.
- 278 [6] Muñoz-Castillo AI, et al. (2019) Three decades of heat stress exposure in Caribbean coral reefs:  
279 a new regional delineation to enhance conservation. *Scientific Reports* 9:11013.
- 280 [7] Ainsworth CH, Mumby PJ (2015) Coral–algal phase shifts alter fish communities and reduce  
281 fisheries production. *Global Change Biology* 21:165–172.
- 282 [8] Worm B, et al. (2006) Impacts of Biodiversity Loss on Ocean Ecosystem Services. *Science*  
283 314:787–790.
- 284 [9] Palumbi SR, et al. (2009) Managing for ocean biodiversity to sustain marine ecosystem services.  
285 *Frontiers in Ecology and the Environment* 7:204–211.
- 286 [10] Spalding M, et al. (2017) Mapping the global value and distribution of coral reef tourism. *Marine*  
287 *Policy* 82:104–113.
- 288 [11] Margalef R (1968) *Perspectives in Ecological Theory* (University of Chicago Press, Chicago).
- 289 [12] Odum EP (1969) The strategy of ecosystem development. *Science* 164:262–270.
- 290 [13] Nee S, Read AF, Greenwood JJD, Harvey PH (1991) The relationship between abundance and  
291 body size in British birds. *Nature* 351:312–313.
- 292 [14] Brown JH, Gillooly JF, Allen AP, M. V, West GB (2004) Toward a metabolic theory of ecology.  
293 *Ecology* 85:1771–1789.
- 294 [15] Elton CS (1927) *Animal Ecology* (University of Chicago Press, Chicago, IL).
- 295 [16] Sheldon RW, Prakash A, Sutcliffe Jr. WH (1972) The Size Distribution of Particles in the Ocean.  
296 *Limnology and Oceanography* 17:327–340.

- 297 [17] Woodson CB, Schramski JR, Joye SB (2018) A unifying theory for top-heavy ecosystem structure  
298 in the ocean. *Nature Communications* 9:1–8.
- 299 [18] Hatton IA, Heneghan RF, Bar-On YM, Galbraith ED (2021) The global ocean size spectrum  
300 from bacteria to whales. *Science Advances* 7:eabh3732.
- 301 [19] Kleiber M (1932) Body size and metabolism. *Hilgardia* 6:315–353.
- 302 [20] Andersen KH, et al. (2016) Characteristic Sizes of Life in the Oceans, from Bacteria to Whales.  
303 *Annual Review of Marine Science* 8:217–241.
- 304 [21] Pascual M, Dunne JA (2005) *Ecological Networks: Linking Structure to Dynamics in Food Webs*  
305 (Oxford Univ. Press).
- 306 [22] Trebilco R, Baum JK, Salomon AK, Dulvy NK (2013) Ecosystem ecology: size-based constraints  
307 on the pyramids of life. *Trends in Ecology & Evolution* 28:423–431.
- 308 [23] Fick SE, Hijmans RJ (2017) WorldClim 2: new 1-km spatial resolution climate surfaces for global  
309 land areas. *International Journal of Climatology* 37:4302–4315.
- 310 [24] Barneche DR, et al. (2021) Warming impairs trophic transfer efficiency in a long-term field  
311 experiment. *Nature* 592:76–79.
- 312 [25] McCauley DJ, et al. (2018) On the prevalence and dynamics of inverted trophic pyramids and  
313 otherwise top-heavy communities. *Ecology Letters* 21:439–454.
- 314 [26] McCann KS, Rasmussen JB, Umbanhowar J (2005) The dynamics of spatially coupled food webs.  
315 *Ecology Letters* 8:513–523.
- 316 [27] Mourier J, et al. (2016) Extreme Inverted Trophic Pyramid of Reef Sharks Supported by Spawning  
317 Groupers. *Current Biology* 26:2011–2016.
- 318 [28] Barneche DR, Allen AP (2018) The energetics of fish growth and how it constrains food-web  
319 trophic structure. *Ecology Letters* 21:836–844.
- 320 [29] White EP, Ernest SKM, Kerkhoff AJ, Enquist BJ (2007) Relationships between body size and  
321 abundance in ecology. *Trends in Ecology & Evolution* 22:323–330.
- 322 [30] Pearl J (2009) *Causality: Models, Reasoning, and Inference* (Cambridge Univ. Press).
- 323 [31] Shipley B (2016) *Cause and Correlation in Biology* (Cambridge University Press).
- 324 [32] Reichenbach H (1956) *The direction of time* (The University of California Press).
- 325 [33] Bareinboim E, Pearl J (2016) Causal inference and the data-fusion problem. *PNAS* 113:7345–  
326 7352.



- 327 [34] Imbens GW (2020) Potential outcome and directed acyclic graph approaches to causality: Rele-  
328 vance for empirical practice in economics. *J. of Economic Literature* 58:1129–1179.
- 329 [35] Robinson JPW, Wilson SK, Jennings S, Graham NAJ (2019) Thermal stress induces persistently  
330 altered coral reef fish assemblages. *Global Change Biology* 25:2739–2750.
- 331 [36] Williams RJ, Martinez ND (2000) Simple rules yield complex food webs. *Nature* 404:180–183.
- 332 [37] Berlow EL, et al. (2009) Simple prediction of interaction strengths in complex food webs. *Pro-*  
333 *ceedings of the National Academy of Sciences* 106:187–191.
- 334 [38] Barnes C, Maxwell D, Reuman DC, Jennings S (2010) Global patterns in predator–prey size  
335 relationships reveal size dependency of trophic transfer efficiency. *Ecology* 91:222–232.
- 336 [39] Edgar GJ, et al. (2020) Establishing the ecological basis for conservation of shallow marine life  
337 using Reef Life Survey. *Biological Conservation* 252:108855.
- 338 [40] Mora C, et al. (2011) Global Human Footprint on the Linkage between Biodiversity and Ecosys-  
339 tem Functioning in Reef Fishes. *PLOS Biology* 9:e1000606.
- 340 [41] Saha K, et al. (2018) The Coral Reef Temperature Anomaly Database (CoRTAD) Version 6 -  
341 Global, 4 km Sea Surface Temperature and Related Thermal Stress Metrics for 1982 to 2019.  
342 NOAA National Centers for Environmental Information. Dataset.
- 343 [42] Saavedra S, Bartomeus I, Godoy O, Rohr RP, Zu P (2022) Towards a system-level causative  
344 knowledge of pollinator communities. *Philosophical Transactions of the Royal Society B: Biolog-*  
345 *ical Sciences* 377:20210159.
- 346 [43] Eddy TD, et al. (2021) Energy Flow Through Marine Ecosystems: Confronting Transfer Effi-  
347 ciency. *Trends in Ecology & Evolution* 36:76–86.
- 348 [44] Slobodkin LB (2001) The good, the bad and the reified. *Evolutionary Ecology Research* 3:91–105.
- 349 [45] Brose U, Williams RJ, Martinez ND (2006) Allometric scaling enhances stability in complex food  
350 webs. *Ecology Letters* 9:1228–1236.
- 351 [46] Pozas-Schacre C, et al. (2021) Congruent trophic pathways underpin global coral reef food webs.  
352 *Proceedings of the National Academy of Sciences* 118.
- 353 [47] Small C, Nicholls RJ (2003) A Global Analysis of Human Settlement in Coastal Zones. *Journal*  
354 *of Coastal Research* 19:584–599.
- 355 [48] Halpern BS, et al. (2015) Spatial and temporal changes in cumulative human impacts on the  
356 world’s ocean. *Nature Communications* 6:7615.

- 357 [49] Hoegh-Guldberg O (1999) Climate change, coral bleaching and the future of the world's coral  
358 reefs. *Marine and Freshwater Research* 50:839–866.
- 359 [50] Mora C, et al. (2006) Coral Reefs and the Global Network of Marine Protected Areas. *Science*  
360 312:1750–1751.
- 361 [51] Moreno-Mateos D, et al. (2017) Anthropogenic ecosystem disturbance and the recovery debt.  
362 *Nature Comm.* 8:14163.
- 363 [52] Tabi A, Gilarranz LJ, Saavedra S (2022) Data from: Marine protected areas maintain pyramid-  
364 like structures of coral-reef fish communities, Dryad, Dataset.
- 365 [53] UNEP-WCMC, WorldFish Centre, WRI, TNC (2021) Global distribution of warm-water coral  
366 reefs, compiled from multiple sources including the Millennium Coral Reef Mapping Project.  
367 Version 4.1. Includes contributions from IMaRS-USF and IRD (2005), IMaRS-USF (2005) and  
368 Spalding et al. (2001). Cambridge (UK): UN Environment World Conservation Monitoring Centre.
- 369 [54] UNEP-WCMC and IUCN (2022) Protected Planet: The World Database on Protected Ar-  
370 eas (WDPA) and World Database on Other Effective Area-based Conservation Measures (WD-  
371 OECM), January 2022, Cambridge, UK: UNEP-WCMC and IUCN.
- 372 [55] Center for International Earth Science Information Network CIESIN Columbia University (2020)  
373 Gridded population of the world, version 4 (gpwv4): Basic characteristics, revision 11. pal-  
374 isades,448 ny: Nasa socioeconomic data and applications center (sedac), (Gland, Switzerland:  
375 IUCN). Technical Report No. 26.
- 376 [56] Havens K (1992) Scale and Structure in Natural Food Webs. *Science* 257:1107–1109.
- 377 [57] Hamilton SL, et al. (2007) Size-selective harvesting alters life histories of a temperate sex-changing  
378 fish. *Ecological Applications: A Publication of the Ecological Society of America* 17:2268–2280.
- 379 [58] Kalisch M, Mächler M, Colombo D, Maathuis MH, Bühlmann P (2012) Causal Inference Using  
380 Graphical Models with the R Package pcalg. *Journal of Statistical Software* 47:1–26.
- 381 [59] Hopf JK, Caselle JE, White JW (2021) Recruitment variability and sampling design interact to  
382 influence the detectability of protected area effects. *Ecological Applications*.

383

## Supplementary Information for

384

# Protection from harvesting promotes energetically efficient structures in marine communities

385

386 Andrea Tabi<sup>1,2</sup>, Luis J. Gilarranz<sup>3</sup>, Spencer Wood<sup>4</sup>, Jennifer Dunne<sup>5</sup>, Serguei Saavedra<sup>6</sup>

387

<sup>1</sup>Institute for Cross-Disciplinary Physics and Complex Systems (IFISC),

388

Consejo Superior de Investigaciones Científicas (CSIC) and University of Balearic Islands,

389

07122 Palma de Mallorca, Spain

390

<sup>2</sup>School of Biological Sciences, University of Canterbury,

391

Private Bag 4800, Christchurch 8140, New Zealand

392

<sup>3</sup>Department of Aquatic Ecology, Eawag (Swiss Federal Institute of Aquatic Science and Technology),

393

Überlandstrasse 133, 8600, Dübendorf, ZH, Switzerland

394

<sup>5</sup>The Santa Fe Institute,

395

Santa Fe, NM 87501, USA

396

<sup>6</sup>Department of Civil and Environmental Engineering, MIT,

397

77 Massachusetts Av., 02139 Cambridge, MA, USA

398

## Contents

399

**S1 Sampling effort**

**S2**

400

**S2 Supplementary Table**

**S3**

401

**S3 Supplementary Figures**

**4**

## 402 S1 Sampling effort

403 We also showed that results can be dependent on the number of annual sampling events. The seasonal  
404 variations in fish populations affect population dynamics, which causes temporal changes in composi-  
405 tion (59). Therefore, we conducted a rarefaction analysis on the entire dataset to assess the effect of  
406 sampling effort on species richness at a given location and time (year). Figure S1 shows that reliable  
407 metrics about the communities can be produced only when the sampling effort is more than one time  
408 per year. Moreover, our rarefaction analysis concluded that increased sampling effort ( $> 1$  per year)  
409 provides a more reliable description of the composition of communities (number of species: Figure S1,  
410 abundance of species: Table S1).

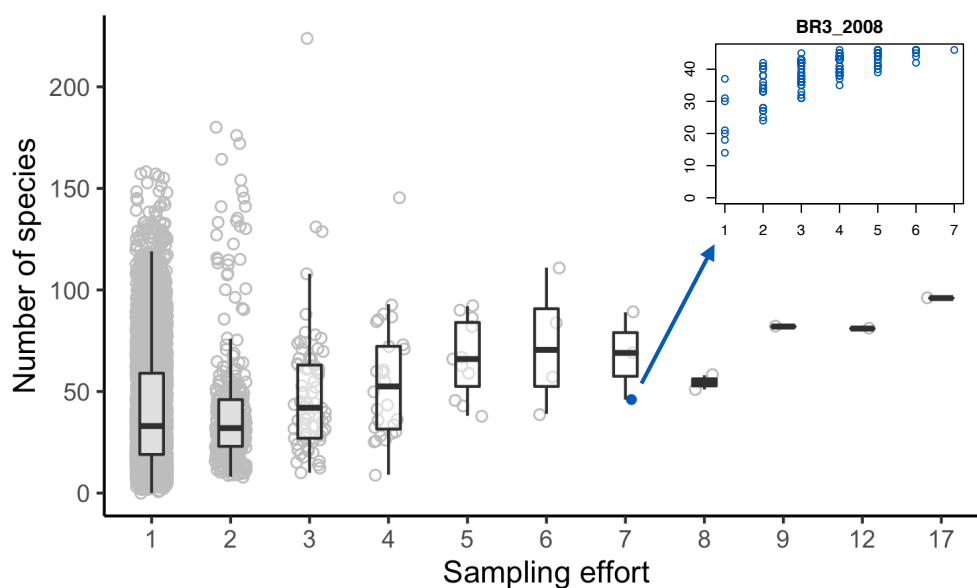

Supplementary Figure S1: **Sampling effort per year and an example of a rarefaction curve.** The grey circles represent communities aggregated in a given location across a year. The majority of communities were sampled once per year, and only a small fraction of the aggregated communities were sampled more than once a year (sampling effort  $> 1$ ). For communities sampled more than once in a given year, we conducted a rarefaction analysis to estimate the effect of sampling effort on species richness by resampling communities and then plotting the number of species in each constructed community against sampling effort (an example shown in the top right panel).

411 **S2 Supplementary Table**

|   | Distribution 1                              | Distribution 2                              | KS test (p-value) |
|---|---------------------------------------------|---------------------------------------------|-------------------|
| 1 | Species richness of communities with SE > 1 | Species richness of communities with SE = 1 | $< 10^{-3}$       |
| 2 | Species richness of all communities         | Species richness of communities with SE = 1 | 0.9954            |
| 3 | Species richness of all communities         | Species richness of communities with SE > 1 | $< 10^{-2}$       |
| 4 | Species richness of all communities         | Species richness of communities with SE > 2 | $< 10^{-5}$       |
| 5 | Species richness of communities with SE > 1 | Species richness of communities with SE > 2 | $< 10^{-3}$       |
| 6 | Species richness of communities with SE > 2 | Species richness of communities with SE > 3 | 0.2219            |
| 7 | Species richness of communities with SE > 3 | Species richness of communities with SE > 4 | 0.6984            |

Supplementary Table S1: We used the Kolmogorov–Smirnov test to compare the empirical distributions of species richness across communities with different levels of sampling effort. Two samples are considered not drawn from the same distribution if the p-values  $< \alpha$ , where we set  $\alpha = 0.05$ .

412 **S3 Supplementary Figures**

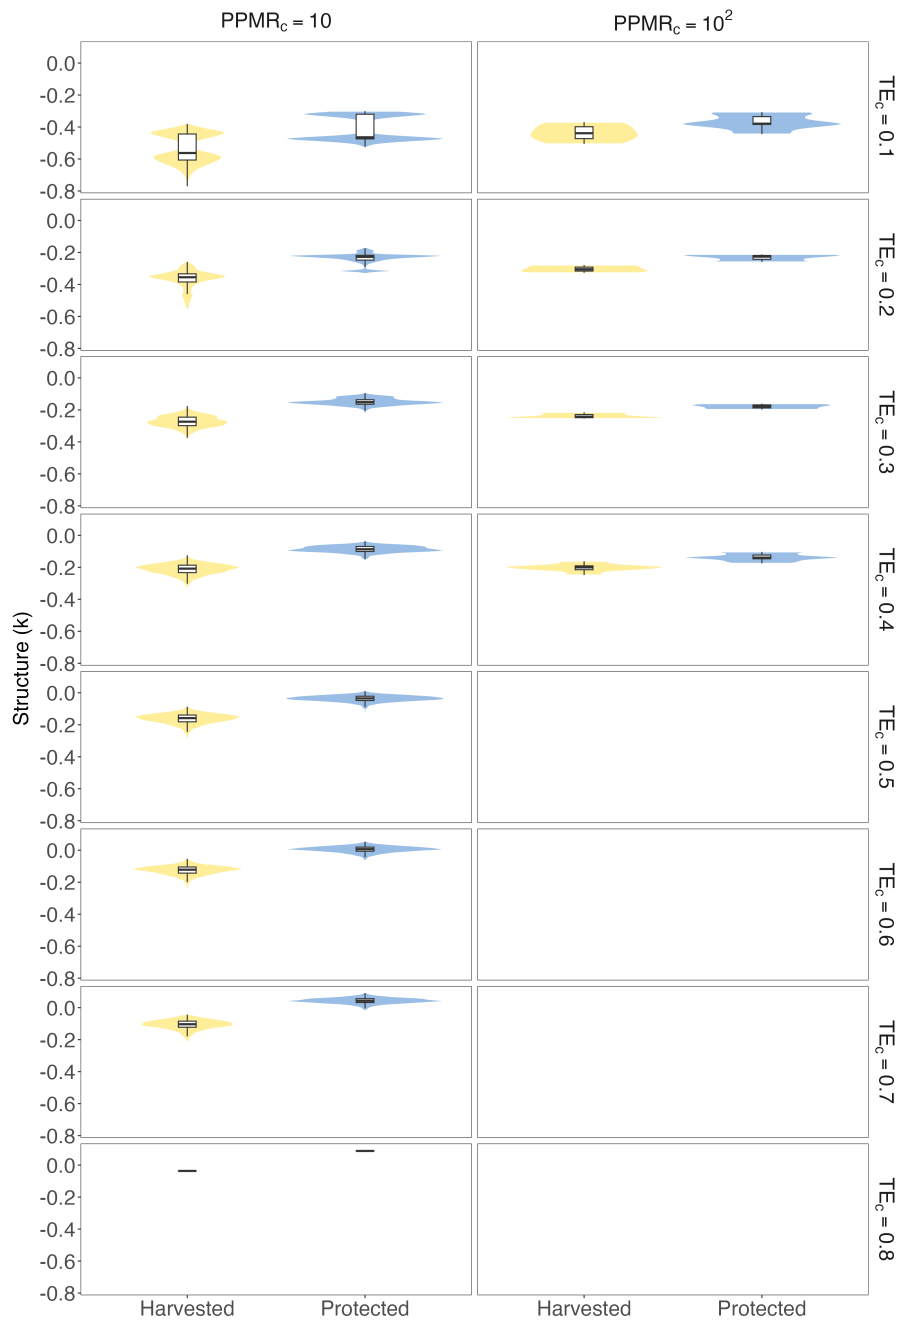

Supplementary Figure S2: **Community structure by average predator prey mass ratio ( $PPMR_c$ ) and transfer efficiency ( $TE_c$ ).** Similar to Figure 1 (main text), but here we also change  $PPMR_c$  to show that our results are general to wider class of marine communities.
